# Supplementary material for: Effects of marathon race on selected myokines and sclerostin in middle-aged male amateur runners
Source: PubMed Central journal article supplement (PMC7854637; doi:10.1038/s41598-021-82288-z), 2021-02-02
Supplement: 41598_2021_82288_MOESM2_ESM.pdf [file 41598_2021_82288_MOESM2_ESM.pdf]

Effects of marathon race on selected myokines and sclerostin in middle-aged male amateur runners

**Figure S1.** The route of the Visegrad Marathon
