# Supplementary material for: Effects of marathon race on selected myokines and sclerostin in middle-aged male amateur runners
Source: PubMed Central journal article supplement (PMC7854637; doi:10.1038/s41598-021-82288-z), 2021-02-02
Supplement: 41598_2021_82288_MOESM4_ESM.pdf [file 41598_2021_82288_MOESM4_ESM.pdf]

Effects of marathon race on selected myokines and sclerostin in middle-aged male amateur runners

Table S1. Blood concentrations of biochemical indices in marathon runners

|                      | Before<br>(1) | <i>p-value</i><br>1 vs 2 | 24 h after<br>(2) | <i>p-value</i><br>2 vs 3 | 72 h after<br>(3) | <i>p-value</i><br>1 vs 3 | <i>ANOVA</i><br><i>p-value</i> | Effect size<br>$\eta^2$ |
|----------------------|---------------|--------------------------|-------------------|--------------------------|-------------------|--------------------------|--------------------------------|-------------------------|
| Myostatin [ng/mL]    | 24.5 ± 4.10   | 0.0002                   | 30.29 ± 5.34      | 0.9400                   | 30.0 ± 4.82       | 0.0002                   | <0.0001                        | 0.72                    |
| Irisin [ng/mL]       | 7.3 ± 0.98    | 0.1771                   | 7.9 ± 1.33        | 0.4443                   | 8.3 ± 0.98        | 0.0159                   | 0.0200                         | 0.35                    |
| Sclerostin [pmol/mL] | 25.8 ± 5.67   | 0.1113                   | 30.0 ± 6.46       | 0.2831                   | 33.0 ± 6.24       | 0.0045                   | 0.0059                         | 0.43                    |
| OPG [pmol/mL]        | 3.3 ± 0.88    | 0.0002                   | 4.8 ± 1.29        | 0.0387                   | 4.2 ± 1.46        | 0.0069                   | 0.0000                         | 0.68                    |
| 25(OH)D [ng/mL]      | 30.3 ± 4.52   | 0.9896                   | 30.4 ± 5.04       | 0.0744                   | 28.7 ± 6.24       | 0.0964                   | 0.0529                         | 0.23                    |
| PTH [pg/mL]          | 99.9 ± 38.62  | 0.0112                   | 130.7 ± 10.97     | 0.7133                   | 138.1 ± 18.79     | 0.0021                   | 0.0017                         | 0.51                    |
| IL-6 [pg/ml]         | 5.2 ± 2.77    | 0.0001                   | 9.7 ± 4.61        | 0.0019                   | 7.2 ± 3.62        | 0.0114                   | <0.0001                        | 0.75                    |
| TNF $\alpha$ [pg/mL] | 2.4 ± 0.61    | 0.0001                   | 6.2 ± 1.85        | 0.0002                   | 4.6 ± 1.56        | 0.0069                   | 0.0000                         | 0.83                    |
| hsCRP [mg/L]         | 0.02 ± 0.015  | 0.0001                   | 0.10 ± 0.036      | 0.0002                   | 0.05 ± 0.026      | 0.0510                   | <0.0001                        | 0.79                    |
| Myoglobin [ng/mL]    | 49.0 ± 18.35  | 0.0001                   | 199.5 ± 95.92     | 0.0304                   | 97.3 ± 53.30      | 0.3526                   | 0.0001                         | 0.69                    |

Data are presented as mean ± SD; 1: before marathon race, 2: 24 h after marathon race, 3: 72 h after marathon race
